# Supplementary material for: A deep-learning classifier identifies patients with clinical heart failure using whole-slide images of H&E tissue
Source: PubMed Central journal article supplement (PMC5882098; doi:10.1371/journal.pone.0192726), 2018-04-03
Supplement: pone.0192726.s004.pdf [file pone.0192726.s004.pdf]

### Supplementary Table S 1

| Layer   | Kernel size | Kernels | Stride | Output size  |
|---------|-------------|---------|--------|--------------|
| Input   |             |         |        | 3 x 64 x 64  |
| Conv 1a | 3x3         | 16      | 1      | 16 x 62 x 62 |
| Conv 1b | 2x2         | 16      | 2      | 16 x 31 x 31 |
| Conv 2a | 3x3         | 16      | 1      | 16 x 29 x 29 |
| Conv 2b | 3x3         | 16      | 2      | 16 x 14 x 14 |
| Conv 3a | 3x3         | 16      | 1      | 16 x 12 x 12 |
| Conv 3b | 4x4         | 16      | 2      | 16 x 5 x 5   |
| Fc-conv | 5x5         | 2       | -      | 2            |

**Table S 1. Primary neural network architecture.**

The primary network used in this study was adapted from Janowczyk and Madabhushi (1). This fully-convolutional architecture is composed of alternating convolutional, batch normalization (2), and Rectified Linear Unit (ReLU) activation layers (3, 4). The network has approximately 13,500 learnable parameters.

## SUPPLEMENTAL REFERENCES

1. Janowczyk A, Madabhushi A. Deep learning for digital pathology image analysis: A comprehensive tutorial with selected use cases. *J Pathol Inform.* 2016;7:29.
2. Ioffe S, Szegedy C. Batch normalization: accelerating deep network training by reducing internal covariate shift. *Proceedings of the 32nd International Conference on International Conference on Machine Learning - Volume 37*; Lille, France. 3045167: JMLR.org; 2015. p. 448-56.
3. Dahl GE, Sainath TN, Hinton GE, editors. Improving deep neural networks for LVCSR using rectified linear units and dropout. *2013 IEEE International Conference on Acoustics, Speech and Signal Processing*; 2013 26-31 May 2013.
4. Nair V, Hinton GE. Rectified linear units improve restricted boltzmann machines. *Proceedings of the 27th International Conference on International Conference on Machine Learning*; Haifa, Israel. 3104425: Omnipress; 2010. p. 807-14.
5. Krizhevsky A, Sutskever I, Hinton GE. ImageNet Classification with Deep Convolutional Neural Networks. *Advances In Neural Information Processing Systems.* 2012:1-9.
6. Szegedy C, Wei L, Yangqing J, Sermanet P, Reed S, Anguelov D, et al., editors. Going deeper with convolutions. *2015 IEEE Conference on Computer Vision and Pattern Recognition (CVPR)*; 2015 7-12 June 2015.
7. He K, Zhang X, Ren S, Sun J. Deep Residual Learning for Image Recognition. *arXiv e-prints.* 2015;abs/1512.03385.
8. Orlov N, Shamir L, Macura T, Johnston J, Eckley DM, Goldberg IG. WND-CHARM: Multi-purpose image classification using compound image transforms. *Pattern Recognit Lett.* 2008;29(11):1684-93.
